# Supplementary material
Source: MDPI journal article supplement (https://www.mdpi.com/2073-4344/10/8/851)
Supplement: s1 [file s1]

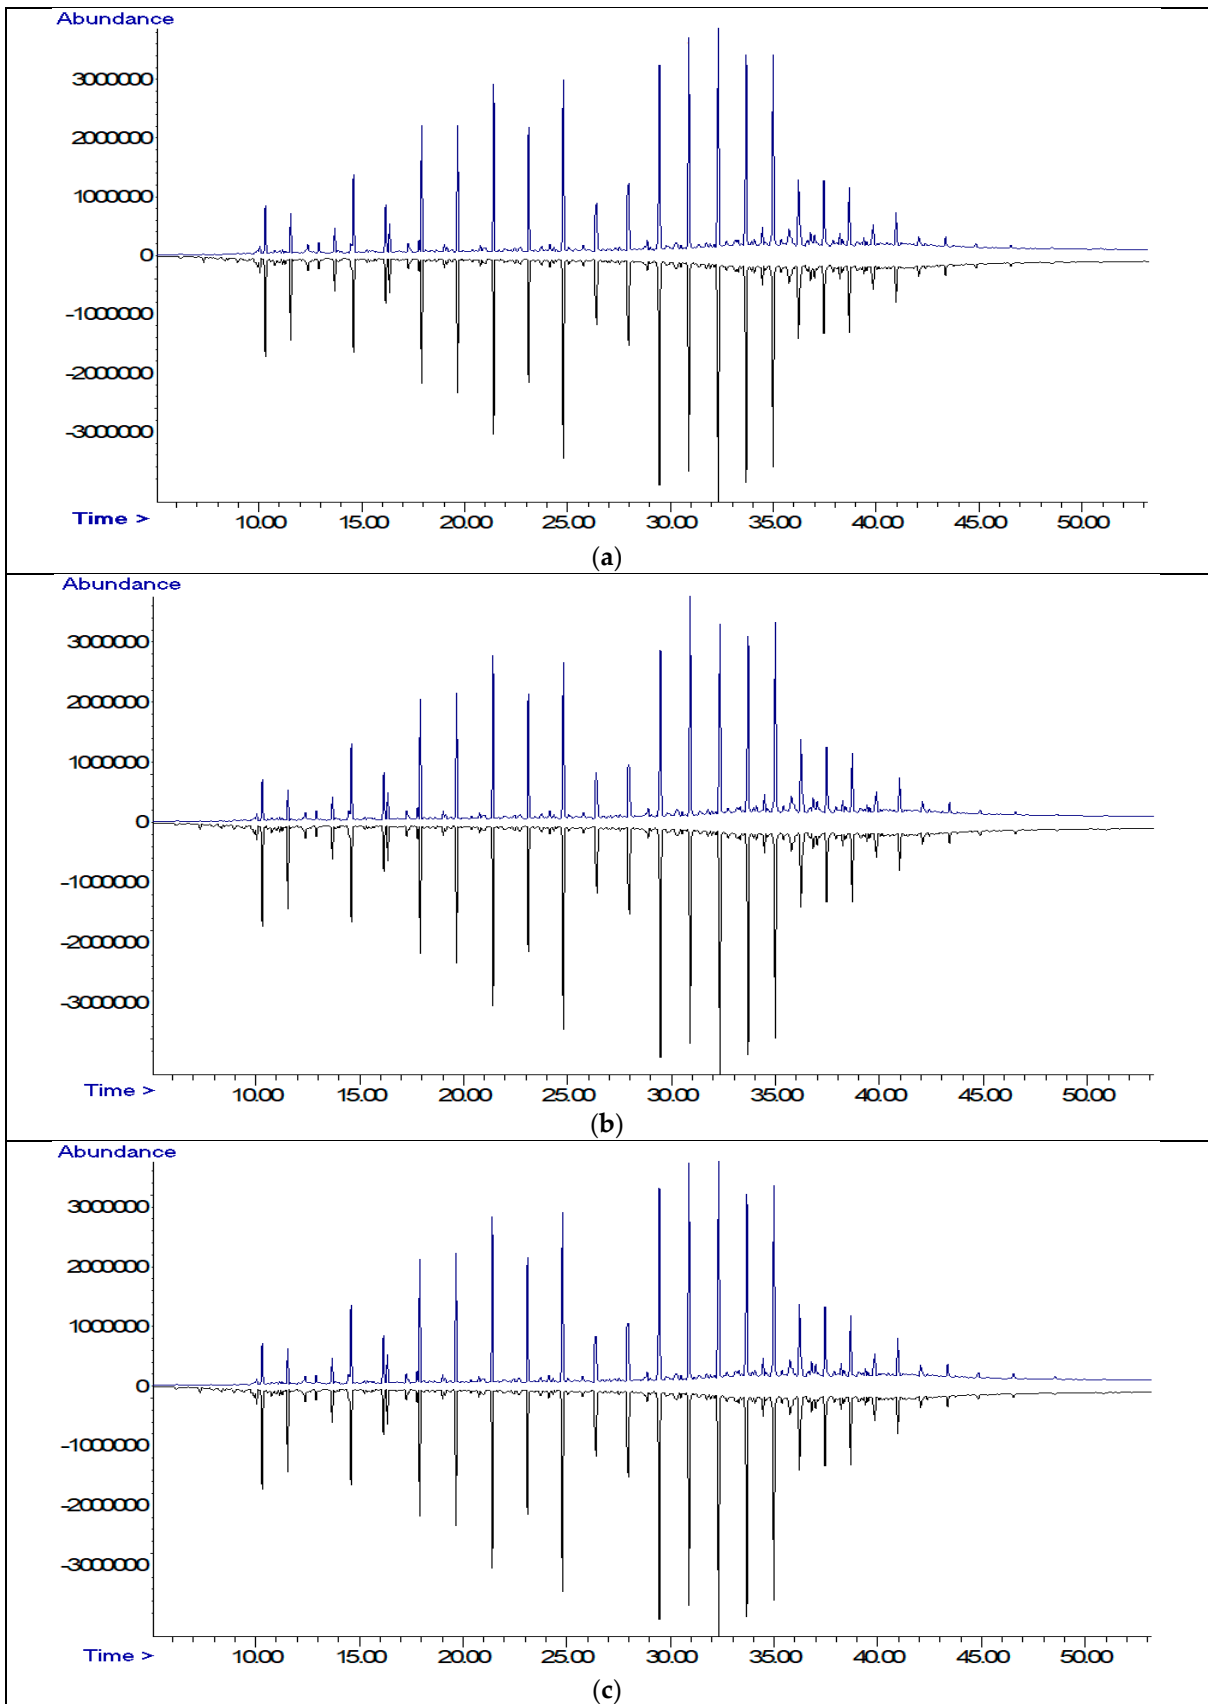

Head to tail comparisons of total ion chromatogram (TIC) exhibits the relative abundance of crude oil at different RT between the control (black) and treated (blue) with D4 (a), D7 (b) and D9 (c). The TIC of all the three isolates shows the relative abundance of lighter end compounds were notably reduced.
